# Energy expenditure across immune challenge severities in a lizard: consequences for innate immunity, locomotor performance, and oxidative status

S.B. Hudson<sup>\* a b</sup>, E.E. Virgin<sup>a b</sup>, M.E. Kepas<sup>a b</sup>, and S.S. French<sup>a b</sup>

<sup>a</sup> Department of Biology, Utah State University, Logan, Utah 84322-5205, USA

<sup>b</sup> Ecology Center, Utah State University, Logan, Utah 84322- 5205, USA

\* Corresponding author: [spencer.hudson@usu.edu](mailto:spencer.hudson@usu.edu)

**ORCID:** 0000-0003-1806-8188

**Key Words:** Antioxidant Capacity; Bactericidal Ability; Energy Metabolites; Lipopolysaccharide; Sprint Speed; Reactive Oxygen Metabolites; Resting Metabolic Rate; *Uta stansburiana*

## ABSTRACT

Reptiles, like other vertebrates, rely on immunity to defend themselves from infection. The energetic cost of an immune response is liable to scale with infection severity, prompting constraints on other self-maintenance traits if immune prioritization exceeds energy budget. In this study, adult male side-blotched lizards (*Uta stansburiana*) were injected with high (20 µg/g body mass), low (10 µg/g body mass), or control (0 µg/g body mass) concentrations of lipopolysaccharide (LPS) to simulate bacterial infections of discrete severities. The costs and consequences of the immune response were assessed through comparisons of change in resting metabolic rates (RMR), energy metabolites

(glucose, glycerol, triglycerides), innate immunity (bactericidal ability), sprint speed changes, and oxidative status (antioxidant capacity, reactive oxygen metabolites). High-LPS lizards had the lowest glucose levels and greatest sprint reductions, while their RMR and bactericidal ability were similar to control lizards. Low-LPS lizards had elevated RMR and bactericidal ability, but glucose levels and sprint speed changes between that of high-LPS and control lizards. Levels of glycerol, triglycerides, reactive oxygen metabolites, and antioxidant capacity did not differ by treatment. Taken together, energy expenditure for the immune response differentially varies with challenge severity, posing consequences for self-maintenance processes in a reptile.

## INTRODUCTION

Immunity is an important aspect of survival for reptiles and other taxa (McKean and Lazzaro 2011; Wobeser 2013). Yet, immune defense and cellular repair are energetically costly (Demas et al. 2011 2012; Hasselquist and Nilsson 2012), requiring intricate coordination between the immune system and other physiological systems (reviewed in Zimmerman et al. 2010 2020). Assuming investment increases proportionally with the severity of an immune challenge, energy deficits may manifest when stronger responses are mounted, conflicting with investment elsewhere (Lochmiller and Deerenberg 2000; Ardia et al. 2011). The extent to which competing physiological systems are concurrently regulated may ultimately determine survival outcomes (Moore and Hopkins 2009; Graham et al. 2011; Meylan et al. 2013). Despite growing evidence of immune prioritization in reptiles (Neuman-Lee and French 2014; Smith et al. 2017;

Hudson et al. 2021), whether infection severity differentially impacts their energy budget and competing self-maintenance processes has not been resolved.

Energy expenditure during costly physiological processes, such as an immune response, is mediated by metabolic changes (Ganeshan and Chawla 2014). For reptiles, shifts in metabolic activity (e.g., O<sub>2</sub> consumption) and energy metabolites (e.g., glucose, triglycerides, glycerol) likely mediate immune activation and maintenance (Price 2017; Lind et al. 2020; Hudson et al. 2020a). Energetic adjustments for the immune response in animals have so far been shown to vary by species (Martin et al. 2003; Merlo et al. 2014), sex (Brace et al. 2015), immune challenge type (Cox et al 2015; Smith et al. 2017), and infection severity (Armour et al. 2020). Yet, energy strategy for reptilian immune activation is not well understood, prompting the question of how infection severity interacts with energetic state and self-maintenance.

Prioritizing energy for an immune response could conflict with systems that are necessary for meeting ongoing ecological challenges, particularly those involving locomotor performance (e.g., fleeing, foraging; Le Galliard et al. 2004). Differences in locomotor capacities are accrued by long-term muscle development and maintenance costs, as well as the daily cost of muscle use (Atherton and Smith 2012; Lailvaux et al. 2018). For reptiles, locomotor performance can decrease while mounting an immune response (e.g., sprint speed; Zamora-Camacho et al. 2014), and immunocompetence can diminish with frequent and intense exercise (Husak et al. 2016 2017; Wang et al. 2019). These reciprocal outcomes suggest the energetic costs of investment can constrain expression of competing self-maintenance traits. The costs associated with immune

challenge severity may in turn impact the degree to which locomotor performance becomes limited.

Mounting an immune response may not only impact cellular processes relevant to immediate survival, but those that contribute to longevity (Buttemer et al. 2010; van de Crommenacker et al. 2010). Pathways that destroy pathogens (e.g., acute phase response; Cray et al. 2009) are often augmented by the production of reactive oxygen species (reviewed in West et al. 2011; Nathan and Cunningham-Bussel 2013). Although prooxidants are regularly generated for essential cellular functions (Halliwell and Gutteridge 2015), excessive amounts can lead to oxidative stress, particularly when there is an imbalance with antioxidant defenses (Sorci and Faivre 2008; Sies et al. 2017). Oxidative stress can cause severe damage to DNA, proteins, and lipids if prolonged (i.e., oxidative damage), potentially compromising multiple self-maintenance processes that contribute to long-term survival (Metcalf and Alonso-Alvarez 2010). The potential for oxidative stress has recently been shown to scale with immune challenge severity (Armour et al. 2020), yet if the oxidative outcomes of immune activity translate to reptiles is unclear.

The present study tested whether immune challenge severity alters energy use, innate immunity, locomotor performance, and oxidative status in side-blotched lizards (*Uta stansburiana*). Lizards were subjected to discrete concentrations (control, low, or high) of *E. coli*-derived lipopolysaccharides (LPS) and monitored for changes in metabolic activity ( $O_2$  consumption), energy metabolites (glucose, triglycerides, glycerol), bactericidal ability, sprint capacity, and oxidative status (antioxidant capacity, reactive oxygen metabolites). We hypothesized that increasing immune challenge

severity would proportionally increase metabolic activity, but also decrease energy metabolites, sprint capacity, and oxidative status.

## METHODS

### *Animals and overview*

Adult male side-blotched lizards ( $n = 53$ ) were captured with a snare pole from Washington County, Utah, USA during April 16 – 17 2019. During collection, lizards were inspected and kept if there were no open wounds or severe mite infections present. On the following day, all lizards were transported to Utah State University in Logan, Utah, where each lizard was housed in a plastic terrarium (48 x 18 x 23 cm) with paper substrate, a refuge, and a water dish. Terraria were stored on shelves inside programmable environmental chambers (DR-36VL, Percival Scientific) that included internal temperature and humidity controllers and a lighting system of vertically mounted fluorescent lamps. Environmental controllers were set to maintain a relative humidity of 60% and nycthemeral temperatures of  $36 \pm 1$  °C during a 12-h light period (0800 – 2000) and  $20 \pm 1$  °C during a 12-h dark period (2000 – 0800). All terraria were positioned similarly throughout the chambers ( $0.3 \pm 0.05$  m from nearest light source).

Lizards were assigned an individual identity and measured for body mass (mean =  $4.54 \text{ g} \pm 0.07 \text{ SEM}$ ) with a digital scale ( $\pm 0.1$  g, model MS500, Pesola, Schindellegi, Switzerland) and snout-vent length (mean =  $49.56 \text{ mm} \pm 0.29 \text{ SEM}$ ) with a metric ruler. Body mass and snout-vent length metrics were controlled for in an interspersed assignment of one of three groups: control ( $n = 17$ ), low LPS ( $n = 16$ ), or high LPS ( $n =$

20). All groups were of similar body mass ( $F_{2,50} = 1.85$ ,  $p = 0.168$ ) and snout-vent length ( $F_{2,50} = 0.92$ ,  $p = 0.406$ ) as a result. Lizards were given 3-d to acclimate and achieve physiological baseline prior to undergoing the 7-d experiment (Table 1; Obernier and Baldwin 2006). All procedures described below were permitted under Utah State Department of Wildlife Resources (COR #1COLL8382) and approved by the Utah State University Institutional Animal Care and Use Committees (protocol #2529).

### *Feeding regime*

Lizards were fed *ad libitum* during the acclimation period and switched to a controlled, restrictive feeding regimen at the start of the experiment (e.g., Lailvaux et al. 2012; Husak et al. 2016). Lizards from each treatment were fed pre-weighed pin-head crickets (Fluker Farms, Port Allen, Louisiana, USA) on days 2 and 4 (Table 1). Rather than limiting the number of crickets allotted to each lizard, the total mass of all crickets was instead limited to 0.16 g per feeding period (mean =  $0.129 \text{ g} \pm 0.001 \text{ SEM}$ ). Uneaten crickets were removed and weighed on days 3 and 5 to calculate the net difference in pre- and post-feeding mass (i.e., food intake mass). When no crickets were eaten, food intake mass was recorded as zero for the sampling occasion. The cumulative mass of crickets allotted throughout the study did not differ among lizards ( $F_{2,50} = 0.208$ ,  $p = 0.813$ ,  $n = 53$ ), nor did food intake mass ( $F_{2,50} = 0.57$ ,  $p = 0.569$ ,  $n = 53$ ).

### *Lipopolysaccharide injections*

To simulate an infection, treatment lizards received intraperitoneal injections of

LPS (serotype 0127:B8, Sigma-Aldrich, St. Louis, MO) diluted in phosphate-buffered saline (PBS). Control lizards instead received intraperitoneal injections of only PBS. The LPS injections contained either low (10 µg LPS/20 µl PBS) or high (20 µg LPS/20 µl PBS) concentrations, while control injections had no concentration of LPS (0 µg LPS/20 µl PBS). All dosages were mass-adjusted (20 µl/g body mass) based on previous research with this species (Smith et al. 2017). Lizards were returned to their individual enclosures immediately after injection.

### *Metabolic measurements*

Resting metabolic rates (RMR) were measured using closed-flow respirometry (Lighton, 2008) between 2300 – 0700 h on days 1 and 5, approximately 48 h before and after injection (Table 1). Food was restricted on days 2 and 4, approximately 24 h prior to sampling, to limit confounding effects of digestion (Burton et al. 2011). Lizards were then transferred from their terraria to one of fifteen 700-mL glass respirometry chambers (RC-3, Sable Systems, Las Vegas, NV) housed in an incubator without light at  $36 \pm 0.6$  °C (Heratherm IMH180, Thermo Scientific, Waltham, MA). Metabolic chambers were flushed for 1 h and supplied with dry, CO<sub>2</sub>-free air (i.e., air scrubbed with Drierite® and Ascarite®) at 500 mL/min using a mass flow system and pump (MFS, Sable Systems) and two 8- channel multiplexers calibrated for closed- flow operation (RM- 8, Sable Systems). Air exiting each chamber was dried, sampled by a calibrated carbon dioxide analyzer (CA-10, Sable Systems), scrubbed, and then sampled again by a calibrated oxygen analyzer (Oxzilla, Sable Systems). Sampling and data collection were automated

using Expedata software (v. 1.9.1, Sable Systems) so that each chamber was sampled for O<sub>2</sub> consumption every hour per trial. Volumetrics of O<sub>2</sub> consumption were averaged across measures and calculated as a rate over time (ml/hr). Under the assumption that metabolic rates scale as a  $\frac{3}{4}$  power of body size (Kleiber 1947; Brown et al. 2004), milliliters of O<sub>2</sub> hr<sup>-1</sup> were mass-adjusted for each lizard using their body mass<sup>0.75</sup> (Smith et al. 2017). Absolute change in RMR (post-injection measure – pre-injection measure) was calculated to account for individual variation while comparing treatment effects among groups.

#### *Sprint speed measurements*

Sprint speed was quantified on a 2-m racetrack (9 cm wide) to provide an indicator of locomotor capacity (Irschick and Garland 2001). Pre-injection sprint trials took place between 900 – 1100 h on day 1, approximately 60 h prior to injections (Table 1). Post-injection sprint trials took place at the same time on day 5, approximately 36 h after injections. The racetrack included a synthetic carpet substrate and a visible refuge to promote a natural, direct locomotor response to simulated predation (Zani et al. 2009; Tulli et al. 2012; Wagner and Zani 2017). For each set of trials, lizards were removed from the environmental chambers across four groups (N = 13-14 lizards) and raced in a random order. Cloacal temperatures (mean = 31.35 °C ± 0.22 SEM, range = 26.3 - 35.2 °C) were measured immediately before racing each lizard using a 1-mm diameter thermocouple (model TP870, Extech Instruments, Waltham, MA) and thermometer (model 561, Fluke, Everett, WA). Pre- and post-injection sprint speeds were not related



to body temperature, nor were there temperature differences among treatment groups ( $p > 0.05$  in all cases).

At the onset of each trial, lizards either immediately fled from the observer or required tactile stimulation by hand. Successive time intervals for when lizards traveled a distance of 0.5 m were collected using markers spanning the racetrack. Times were recorded at 24 fps (41.66 milliseconds between frames) with a video camera (Canon Vixia HF R600) and analyzed using QuickTime Player (v. 7, Apple). Trials were run in duplicate to allow lizards to acclimate to the racetrack. The fastest time from both trials was used to calculate maximal sprint speed (m/s). Lizards that did not successfully complete a trial on either day were excluded from analysis ( $n = 5$ ). Since sprint speed was previously validated to be moderately repeatable in this species ( $n = 10$ ,  $p < 0.001$ ,  $R = 0.786$  [0.475 - 0.903 95% CI]), absolute change in speed (post-injection measure – pre-injection measure) was calculated within individuals to compare among groups.

### *Blood sampling*

Retro-orbital blood samples were collected on day 6, approximately 60 h after LPS treatment (Table 1). Each sample was collected within 3 min between 0900 – 1100 h to control for restraint stress and circadian differences in physiological activity (Tylan et al. 2020). Blood was centrifuged at 6000 RPM for 10 min to separate plasma, which was then isolated and stored at  $-80^{\circ}\text{C}$  until assays were performed. Afterwards, each lizard was weighed again to account for potential changes in body mass during the study. Since there were no treatment differences in body mass change ( $F_{2,50} = 0.09$ ,  $p = 0.914$ ), this

metric was excluded from subsequent analyses. Lizards were allotted 3 d to recover prior to returning them to their respective points of capture.

#### *Energy metabolite measurements*

Glucose concentrations were measured in blood plasma (1 ul) on an Accu-Chek Aviva Plus (Roche Diagnostics, Indianapolis, IN), which has been validated for use in several vertebrates (Stoot et al. 2014). Glycerol and triglyceride concentrations were measured using sequential enzymatic color endpoint assays (F6428, T2449 and G7793, Sigma-Aldrich, St. Louis, MO). Both the manufacturer's protocol and a dilution protocol were followed for use with a 96-well plate (see Guglielmo et al. 2002; Fokidis 2011 2012). Glycerol reagent was added to blood plasma (5 uL) and incubated for 5 min at 37 °C. Absorbance was measured on a spectrophotometer at 505 nm (xMark; BioRad Benchmark, Hercules, CA) to calculate glycerol, an indicator of endogenous triglyceride catabolism. A lipase reagent was then added to dissociate fatty acids from their glycerol backbones (i.e., triglyceride dissociation) and the plate was again incubated for 5 min at 37 °C. Absorbances of triglycerides were measured at 505 nm. Intra-plate variation was 5.57% for glycerol and 3.46% for triglycerides.

#### *Immune measurements*

Bactericidal ability was quantified with a validated volume of blood plasma (6 ul) to assess the relative abundances of circulating immune components (Neuman-Lee and French 2014). Using the protocol outlined in French and Neuman-Lee (2012), a 1:2 plasma dilution was combined with CO<sub>2</sub>-independent medium (Gibco # 18-045-088,

ThermoFisher Scientific, Grand Island, NY), 4 mM l-glutamine,  $10^4$  colony-producing units of *Escherichia coli* (EPower™ Microorganisms #483-581-1, ATCC 8739, MicroBioLogics, St. Cloud, MN), and agar broth on a 96-well microplate. Included were both positive (i.e., media and bacteria with no plasma) and negative (i.e., media and no plasma or bacteria) controls to account for potential growth and ensure there was no contamination. The plate was incubated at 37 °C for a 12-h period, at which point absorbance per well was measured with a microplate reader at 300 nm (xMark; BioRad Benchmark, Hercules, CA). Bactericidal ability was then calculated as  $(1 - (\text{absorbance of sample} / \text{absorbance of positive controls}) \times 100)$ . Each sample was run in duplicate to generate an average percent score of bactericidal ability. Average intra-plate variation was 3.85% and inter-plate variation was 3.94%.

### *Oxidative measurements*

Two types of colorimetric assays were used on blood plasma to measure both reactive oxygen metabolites and the capacity to bind to and clear those metabolites (Vassalle et al. 2004; Vassalle 2008). Reactive oxygen metabolites were measured using a d-ROMs test that detects variable levels of hydroperoxides (MC435, Diacron International, Italy), which signal lipid and protein oxidative damage. Following Lucas and French (2012), 5 µl of plasma were diluted into 100 µl of the provided acidic buffered solution and ‘end-point mode’ manufacturer instructions were followed thereafter for use with 96-well microplates and a spectrophotometer read at 505 nm

(xMark, Bio-Rad). Measures of reactive oxygen metabolites (mg H<sub>2</sub>O<sub>2</sub>/dl) were acquired with average intra-plate variation at 2.92% and inter-plate variation at 4.54%.

Total non-enzymatic antioxidant capacity was measured using an OXY-Adsorbent test (MC002, Diacron International, Italy), which determines effectiveness of the blood antioxidant barrier by quantifying tolerance of the oxidant action of hypochlorous acid (HClO). Here, 2 µl of plasma were diluted in 100 µl of distilled water, and manufacturer instructions were followed thereafter for measuring 96-well microplates with a spectrophotometer at 505 nm (xMark, Bio-Rad). Measures of total antioxidant capacity (mol HClO/ml) were acquired with average intra-plate variation at 2.65% and inter-plate variation at 2.85%.

#### *Statistical treatment of data*

One-Way Analysis of Variance (ANOVA) models were run to compare LPS treatment effects on RMR change, glucose, triglycerides, glycerol, bactericidal ability, sprint speed change, reactive oxygen metabolites, and antioxidant capacity. Tukey method was used for multiple comparisons of significant treatment differences. Residual distributions of models were assessed for normality and homogeneity of variance was compared across groups when appropriate. All analyses and visual representation of data were performed in R statistical software (v. 3.5.1, R Core Team 2018) using the following packages: ‘car’ (v. 2.1-6, Fox et al. 2012), ‘plyr’ (v. 1.8.6, Wickham 2011), ‘reshape2’ (v. 1.2, Wickham 2012), ‘rcompanion’ (v. 2.3.21, Mangiafico 2020), ‘ggplot2’ (v. 3.1.0, Wickham 2016), and ‘ggsignif’ (v. 0.6.0, Ahlmann-Eltze 2019).

## RESULTS

### *Resting metabolic rate*

Mass-adjusted RMR significantly differed across simulated infection severities ( $F_{2,50} = 9.418$ ,  $p = 0.0003$ ,  $n = 53$ ; Fig. 1). Low-LPS lizards exhibited increased rates relative to control lizards ( $p = 0.0002$ ) and high-LPS lizards ( $p = 0.023$ ), but high-LPS and control lizards did not differ ( $p = 0.191$ ).

### *Energy Metabolites*

Glucose significantly differed with simulated infection severity ( $F_{2,46} = 5.558$ ,  $p = 0.007$ ,  $n = 51$ ; Fig. 2), such that levels were lower in high-LPS lizards relative to control lizards ( $p = 0.005$ ). Low-LPS lizards had no relative differences in glucose levels, as they were between those of high-LPS ( $p = 0.566$ ) and control lizards ( $p = 0.107$ ). No differences in triglycerides ( $F_{2,44} = 0.516$ ,  $p = 0.600$ ,  $n = 47$ ) nor glycerol ( $F_{2,44} = 2.028$ ,  $p = 0.144$ ,  $n = 47$ ) were present.

### *Innate immune function*

Bactericidal ability significantly differed with simulated infection severity ( $F_{2,49} = 13.94$ ,  $p < 0.0005$ ,  $n = 52$ ; Fig. 3), whereby low-LPS lizards had greater killing than high-LPS ( $p = 0.007$ ) and control lizards ( $p < 0.0005$ ). High-LPS lizards had marginally non-significant differences in killing compared to control lizards ( $p = 0.057$ ).

### *Sprint performance*

Sprint speed significantly changed with simulated infection severity ( $F_{2,45} = 4.506$ ,  $p = 0.016$ ,  $n = 48$ ; Fig. 4). High-LPS lizards decreased speeds relative to control lizards ( $p = 0.019$ ), but not low-LPS lizards ( $p = 0.102$ ). Low-LPS lizards did not perform differently from control lizards ( $p = 0.674$ ).

### *Oxidative status*

There were no differences in antioxidant capacity ( $F_{2,29} = 2.383$ ,  $p = 0.110$ ,  $n = 33$ ) and reactive oxygen metabolites ( $F_{2,27} = 0.009$ ,  $p = 0.991$ ,  $n = 30$ ) across simulated infection severities.

## **DISCUSSION**

Immunity is vital to survival, yet the intrinsic costs of the immune response pose constraints on energy budget for self-maintenance processes (McKean and Lazzaro 2011). This study demonstrated that simulated infection severity elicits differences in energy expenditure, innate immunity, and locomotor performance for side-blotched lizards, *U. stansburiana*. Greater metabolic activity and glucose usage following LPS challenges partially reflected scaling of energetic costs necessary to mount an effective immune response. Discrepancies in bactericidal ability and sprint speed revealed a complex relationship between immunological and locomotor performance during/after recovery. These findings collectively provide support that immune challenge severity can prompt differences in energetic state and competing traits linked to survival in a reptile.

The LPS challenges in this study led to increased RMR, as recently shown in other reptiles (e.g., snakes; Lind et al. 2020). Yet, significantly greater metabolic upregulation was only detected in low-LPS lizards. The concentration of an LPS challenge can have varying effects on the timing of physiological changes in other taxa (e.g., mammals; Vedder et al. 1999; Bison et al. 2008), suggesting that peak responses could differ by challenge severity (Zamora-Camacho 2018). Previous work assessing the metabolic costs of lower LPS concentrations (2.5-5.0  $\mu\text{g/g}$  body mass) in this species did not detect metabolic change within a shorter, 24-h period (Smith et al. 2017). Metabolic upregulation while mounting an immune response to a more intense challenge could therefore occur sooner than lesser challenges to minimize damaging outcomes. In this case, the comparatively mild metabolic changes detected in high-LPS lizards could be an artifact of sampling period, that is if metabolic rates peaked earlier in time.

High LPS concentrations also led to significantly lower circulating glucose following recovery, but no differences in glycerol and triglycerides. Since glucose has previously been shown to be associated with immune activation and maintenance in *U. stansburiana* (Hudson et al. 2020b), decreased glucose could indicate greater energy expenditure with increased challenge severity, even though they were not reflective of RMR comparisons. If immune prioritization occurred with greater simulated infection severities, metabolic responses could have peaked sooner, at which point energy metabolites (i.e., glucose) were necessarily exhausted. Here, glycerol and triglycerides did not seem necessary for recovery. For other taxa responding to discrete LPS concentrations, glycerol levels have similarly been shown to remain unchanged, while circulating triglycerides decrease (Shini et al. 2008; Armour et al. 2020). If glucose levels

were even lower in this species, perhaps from a more severe infection, triglycerides may then be used as an alternative energy source (e.g., fatty acid oxidation; Price 2017). Nonetheless, only certain metabolites seem to be relevant across the challenge severities and recovery period considered here.

Differences in bactericidal ability for *U. stansburiana* reflect immune activity during each challenge and/or immunological state after recovery (Tan and Kagan 2014). Given that low-LPS lizards demonstrated greater bactericidal ability, the immune response mounted was likely successful in fighting a simulated infection, allowing immunocompetence and other energetically demanding processes to be maintained. Here, activation of the immune system could have occurred sooner, leading to fewer components (e.g., natural antibodies, complement, antimicrobial peptides) remaining in circulation when bactericidal ability was tested (Neuman-Lee and French 2014). Greater immune investment with increased challenge severity would be consistent with lower circulating glucose among high-LPS lizards and, potentially, with their patterns of metabolic activity following recovery.

Locomotor adjustments during recovery were dependent upon challenge severity, as only high-LPS lizards had decreased sprint speeds. Low-LPS lizards were instead capable of mounting an immune response without compromising sprint performance. Locomotor constraints may be attributed to the costs of immune prioritization, as previously shown for lizards challenged with lower LPS dosages (Zamora-Camacho et al. 2014). Energy and nutrients required for maintaining the muscular system could become limited during an immune response, such that the mechanical power responsible for burst locomotor performance decreased (Gleeson and Harrison 1988; Farley 1997; Hudson et



al. 2021). In this study, however, sprint speed changes were not related to energy metabolite levels nor change in body mass, indicating that other resources or factors could be more relevant to recovery.

Sprint performance may also be attributed to motivational state (Foster et al. 2015), which can characteristically change during recovery. Sickness behaviors that accompany the acute phase response to LPS in reptiles (e.g., lethargy) may reduce motivation to perform at maximal capacity during exercise (Adelman and Martin 2009; Rakus et al. 2017; Hart and Hart 2019). Depressions in motivational state may be compounded by pain associated with the inflammatory processes of the acute phase response (Gao et al. 2007; Ashley et al. 2012; Gregory et al. 2013). Lizards with greater LPS infections, and in turn stronger responses, could be further deterred from exercise. Sprint reductions may be co-opted to conserve resource expenditure for the immune response and prevent additional discomfort from rapid muscle contractions (Lopes et al. 2014). Devoting less energy to locomotion could be beneficial if recovering lizards are in refuge and less susceptible to the risks of daily ecological challenges (e.g., predation, competition; Huey and Pianka 1981; Brodie Jr et al. 1991). Multiple behavioral responses to LPS should therefore be considered in future work to test motivational differences among recovering reptiles (Todd et al. 2016; Klinck et al. 2017).

The lack of detectable change in both reactive oxygen metabolites and antioxidant capacity indicates that *U. stansburiana* did not experience immediate oxidative stress during LPS recovery (Costantini 2016). Despite LPS challenges incurring oxidative costs in other taxa at lower dosages (Baylor and Butler 2019; Paardekooper et al 2019; Armour et al. 2020), lizards may instead maintain oxidative resistance across a

wider range of infection severities. Shifts in oxidative status could have occurred during recovery, albeit transiently throughout the inflammatory processes of immunity (Sebastiano et al. 2018; Fritze et al. 2019). During the acute phase response, prooxidants could be mitigated by a proportional release of molecules and enzymes with anti-inflammatory (Thomsen et al. 2013; Belcher et al. 2018) and antioxidant properties (Puertollano et al. 2011; Surai et al. 2019). Oxidative stress from LPS recovery could also have a delayed onset or manifest from more severe challenges, such that any changes in the oxidative markers were undetected within the sampling period and/or LPS concentrations tested (Costantini and Møller 2009). Preventative mechanisms maintaining oxidative resistance across challenge severities should therefore be tested in future studies (Costantini 2019).

In conclusion, the induced reptilian immune response appears to depend upon LPS concentration, resulting in adjustments to both energy expenditure and locomotor performance. Energetic strategies for handling differing severities of an immune challenge do not seem to compromise oxidative status, evidenced by the fact that reactive oxygen metabolites and antioxidant capacity were not affected by LPS overall. Immune prioritization could be a principal strategy across challenge severities for reptiles, whereby energy is increasingly diverted from other self-maintenance processes for upregulation. The costs of performance may only manifest at critical thresholds as a result. Yet, the reptile immune response is presumably more complex than presented in this study (reviewed in Zimmerman et al. 2010 2020). Further disentangling the costs of immunity should provide insight into the proximate and ultimate mechanisms by which reptiles respond to the diversity of immune challenges in the natural world.

## ACKNOWLEDGMENTS

The National Science Foundation [(IOS)-1350070 to S.S.F.] funded laboratory expenses and the Utah State University Ecology Center afforded the costs of travel. Audrey Lidgard and Fallon Moore facilitated quality animal husbandry in the laboratory. Jack Marchetti helped analyze sprint trial videos. Al Savitzky provided constructive feedback on the manuscript prior to submission.

## LITERATURE CITED

- Adelman, J. S., & Martin, L. B. (2009). Vertebrate sickness behaviors: adaptive and integrated neuroendocrine immune responses. *Integrative and Comparative Biology*, 49(3), 202-214.
- Ahlmann-Eltze, C. (2019). ggsignif: Significance Brackets for 'ggplot2'. *R package version 0.6.0*.
- Ardia, D. R., Parmentier, H. K., & Vogel, L. A. (2011). The role of constraints and limitation in driving individual variation in immune response. *Functional Ecology*, 25(1), 61-73.
- Armour, E. M., Bruner, T. L., Hines, J. K., & Butler, M. W. (2020). Low-dose immune challenges result in detectable levels of oxidative damage. *Journal of Experimental Biology*, 223(6).
- Ashley, N. T., Weil, Z. M., & Nelson, R. J. (2012). Inflammation: mechanisms, costs, and natural variation. *Annual Review of Ecology, Evolution, and Systematics*, 43, 385-406.
- Atherton, P., & Smith, K. (2012). Muscle protein synthesis in response to nutrition and exercise. *The Journal of physiology*, 590(5), 1049-1057.

- Baylor, J. L., & Butler, M. W. (2019). Immune challenge-induced oxidative damage may be mitigated by biliverdin. *Journal of Experimental Biology*, 222(6).
- Belcher, J. D., Chen, C., Nguyen, J., Abdulla, F., Zhang, P., Nguyen, H., . . . Brinkman, N. (2018). Haptoglobin and hemopexin inhibit vaso-occlusion and inflammation in murine sickle cell disease: Role of heme oxygenase-1 induction. *PLoS One*, 13(4), e0196455.
- Bison, S., Carboni, L., Arban, R., Bate, S., Gerrard, P. A., & Razzoli, M. (2008). Differential behavioral, physiological, and hormonal sensitivity to LPS challenge in rats. *International Journal of Interferon, Cytokine and Mediator Research*, 1, 1-13.
- Brace, A. J., Sheikali, S., & Martin, L. B. (2015). Highway to the danger zone: exposure - dependent costs of immunity in a vertebrate ectotherm. *Functional Ecology*, 29(7), 924-930.
- Brodie Jr, E., Formanowicz Jr, D., & Brodie III, E. (1991). Predator avoidance and antipredator mechanisms: distinct pathways to survival. *Ethology Ecology & Evolution*, 3(1), 73-77.
- Brown, J. H., Gillooly, J. F., Allen, A. P., Savage, V. M., & West, G. B. (2004). Toward a metabolic theory of ecology. *Ecology*, 85(7), 1771-1789.
- Burton, T., Killen, S., Armstrong, J., & Metcalfe, N. (2011). What causes intraspecific variation in resting metabolic rate and what are its ecological consequences? *Proceedings of the Royal Society B: Biological Sciences*, 278(1724), 3465-3473.
- Buttemer, W. A., Abele, D., & Costantini, D. (2010). From bivalves to birds: oxidative stress and longevity. *Functional Ecology*, 24(5), 971-983.
- Costantini, D. (2019). Understanding diversity in oxidative status and oxidative stress: the opportunities and challenges ahead. *Journal of Experimental Biology*, 222(13), jeb194688.

- Costantini, D., & Møller, A. P. (2009). Does immune response cause oxidative stress in birds? A meta-analysis. *Comparative Biochemistry and Physiology Part A: Molecular & Integrative Physiology*, 153(3), 339-344.
- Cox, C. L., Peadar, R. T., & Cox, R. M. (2015). The metabolic cost of mounting an immune response in male brown anoles (*Anolis sagrei*). *Journal of Experimental Zoology Part A: Ecological Genetics and Physiology*, 323(10), 689-695.
- Cray, C., Zaias, J., & Altman, N. H. (2009). Acute phase response in animals: a review. *Comparative medicine*, 59(6), 517-526.
- Demas, G., Greives, T., Chester, E., & French, S. (2012). The energetics of immunity. *Ecoimmunology*, 259-296.
- Demas, G. E., Zysling, D. A., Beechler, B. R., Muehlenbein, M. P., & French, S. S. (2011). Beyond phytohaemagglutinin: assessing vertebrate immune function across ecological contexts. *Journal of Animal Ecology*, 80(4), 710-730.
- Farley, C. T. (1997). Maximum speed and mechanical power output in lizards. *Journal of Experimental Biology*, 200(16), 2189-2195.
- Fokidis, H. B., Des Roziers, M. B., Sparr, R., Rogowski, C., Sweazea, K., & Deviche, P. (2012). Unpredictable food availability induces metabolic and hormonal changes independent of food intake in a sedentary songbird. *Journal of Experimental Biology*, 215(16), 2920-2930.
- Fokidis, H. B., Hurley, L., Rogowski, C., Sweazea, K., & Deviche, P. (2011). Effects of captivity and body condition on plasma corticosterone, locomotor behavior, and plasma metabolites in curve-billed thrashers. *Physiological and Biochemical Zoology*, 84(6), 595-606.

- Foster, K. L., Collins, C. E., Higham, T. E., & Garland Jr, T. (2015). Determinants of lizard escape performance: decision, motivation, ability, and opportunity. In *Escaping From Predators: An Integrative View of Escape Decisions* (pp. 287-321): Cambridge University Press.
- Fox, J., Weisberg, S., Adler, D., Bates, D., Baud-Bovy, G., Ellison, S., . . . Graves, S. (2012). Package 'car'. *Vienna: R Foundation for Statistical Computing*.
- Fritze, M., Costantini, D., Fickel, J., Wehner, D., Cziráj, G. Á., & Voigt, C. C. (2019). Immune response of hibernating European bats to a fungal challenge. *Biology open*, 8(10).
- Ganeshan, K., & Chawla, A. (2014). Metabolic regulation of immune responses. *Annual review of immunology*, 32, 609-634.
- Gao, X., Kim, H. K., Chung, J. M., & Chung, K. (2007). Reactive oxygen species (ROS) are involved in enhancement of NMDA-receptor phosphorylation in animal models of pain. *Pain*, 131(3), 262-271.
- Gleeson, T. T., & Harrison, J. (1988). Muscle composition and its relation to sprint running in the lizard *Dipsosaurus dorsalis*. *American Journal of Physiology-Regulatory, Integrative and Comparative Physiology*, 255(3), R470-R477.
- Graham, A. L., Shuker, D. M., Pollitt, L. C., Auld, S. K., Wilson, A. J., & Little, T. J. (2011). Fitness consequences of immune responses: strengthening the empirical framework for ecoimmunology. *Functional Ecology*, 25(1), 5-17.
- Gregory, N. S., Harris, A. L., Robinson, C. R., Dougherty, P. M., Fuchs, P. N., & Sluka, K. A. (2013). An overview of animal models of pain: disease models and outcome measures. *The Journal of Pain*, 14(11), 1255-1269.

- Guglielmo, C. G., O'Hara, P. D., & Williams, T. D. (2002). Extrinsic and intrinsic sources of variation in plasma lipid metabolites of free-living western sandpipers (*Calidris mauri*). *The Auk*, 119(2), 437-445.
- Halliwell, B., & Gutteridge, J. M. (2015). *Free radicals in biology and medicine*: Oxford University Press, USA.
- Hart, B. L., & Hart, L. A. (2019). *Sickness behavior in animals. Implications for health and wellness* (Vol. 1).
- Hasselquist, D., & Nilsson, J.-Å. (2012). Physiological mechanisms mediating costs of immune responses: what can we learn from studies of birds? *Animal Behaviour*, 83(6), 1303-1312.
- Hudson, S., Kluever, B., Webb, A., & French, S. (2020a). Steroid hormones, energetic state, and immunocompetence vary across reproductive contexts in a parthenogenetic lizard. *General and comparative endocrinology*, 288, 113372.
- Hudson, S. B., Lidgard, A. D., & French, S. S. (2020b). Glucocorticoids, energy metabolites, and immunity vary across allostatic states for plateau side - blotched lizards (*Uta stansburiana uniformis*) residing in a heterogeneous thermal environment. *Journal of Experimental Zoology Part A: Ecological and Integrative Physiology*.
- Hudson, S. B., Virgin, E. E., Brodie, E. D., & French, S. S. (2021). Recovery from discrete wound severities in side-blotched lizards (*Uta stansburiana*): implications for energy budget, locomotor performance, and oxidative stress. *Journal of Comparative Physiology B*, 1-13.
- Huey, R. B., & Pianka, E. R. (1981). Ecological consequences of foraging mode. *Ecology*, 62(4), 991-999.

- Husak, J. F., Ferguson, H. A., & Lovern, M. B. (2016). Trade - offs among locomotor performance, reproduction and immunity in lizards. *Functional Ecology*, 30(10), 1665-1674.
- Husak, J. F., Roy, J. C., & Lovern, M. B. (2017). Exercise training reveals trade-offs among endurance performance and immune function, but not growth, in juvenile lizards. *Journal of Experimental Biology*, jeb. 153767.
- Irschick, D. J., & Garland Jr, T. (2001). Integrating function and ecology in studies of adaptation: investigations of locomotor capacity as a model system. *Annual Review of Ecology and Systematics*, 32(1), 367-396.
- Kleiber, M. (1947). Body size and metabolic rate. *Physiological reviews*, 27(4), 511-541.
- Klinck, M. P., Mogil, J. S., Moreau, M., Lascelles, B. D. X., Flecknell, P. A., Poitte, T., & Troncy, E. (2017). Translational pain assessment: could natural animal models be the missing link? *Pain*, 158(9), 1633-1646.
- Lailvaux, S. P., Gilbert, R. L., & Edwards, J. R. (2012). A performance-based cost to honest signalling in male green anole lizards (*Anolis carolinensis*). *Proceedings of the Royal Society B: Biological Sciences*, 279(1739), 2841-2848.
- Lailvaux, S. P., & Irschick, D. J. (2007). The evolution of performance-based male fighting ability in Caribbean Anolis lizards. *the american naturalist*, 170(4), 573-586.
- Lailvaux, S. P., Wang, A. Z., & Husak, J. F. (2018). Energetic costs of performance in trained and untrained *Anolis carolinensis* lizards. *Journal of Experimental Biology*, 221(8), jeb176867.
- Le Galliard, J.-F., Clobert, J., & Ferrière, R. (2004). Physical performance and Darwinian fitness in lizards. *Nature*, 432(7016), 502.



- Lighton, J. R. (2008). Flow-through respirometry: the equations. In *Measuring Metabolic Rates* (pp. 94-100): Oxford University Press.
- Lind, C. M., Agugliaro, J., & Farrell, T. M. (2020). The metabolic response to an immune challenge in a viviparous snake, *Sistrurus miliarius*. *Journal of Experimental Biology*, 223(10).
- Lochmiller, R. L., & Deerenberg, C. (2000). Trade - offs in evolutionary immunology: just what is the cost of immunity? *Oikos*, 88(1), 87-98.
- Lopes, P. C., Springthorpe, D., & Bentley, G. E. (2014). Increased activity correlates with reduced ability to mount immune defenses to endotoxin in zebra finches. *Journal of Experimental Zoology Part A: Ecological Genetics and Physiology*, 321(8), 422-431.
- Lucas, L. D., & French, S. S. (2012). Stress-induced tradeoffs in a free-living lizard across a variable landscape: consequences for individuals and populations. *PLoS One*, 7(11), e49895.
- Mangiafico, S. (2020). rcompanion: functions to support extension education program evaluation. R package version 2.3.21. In.
- Martin, L. B., Scheuerlein, A., & Wikelski, M. (2003). Immune activity elevates energy expenditure of house sparrows: a link between direct and indirect costs? *Proceedings of the Royal Society of London. Series B: Biological Sciences*, 270(1511), 153-158.
- McKean, K. A., & Lazzaro, B. P. (2011). The costs of immunity and the evolution of immunological defense mechanisms. In (pp. 299-310): Oxford University Press Oxford.
- Merlo, J. L., Cutrera, A. P., Luna, F., & Zenuto, R. R. (2014). PHA-induced inflammation is not energetically costly in the subterranean rodent *Ctenomys talarum* (tuco-tucos).

- Comparative Biochemistry and Physiology Part A: Molecular & Integrative Physiology*, 175, 90-95.
- Metcalf, N. B., & Alonso - Alvarez, C. (2010). Oxidative stress as a life - history constraint: the role of reactive oxygen species in shaping phenotypes from conception to death. *Functional Ecology*, 24(5), 984-996.
- Meylan, S., Richard, M., Bauer, S., Haussy, C., & Miles, D. (2013). Costs of mounting an immune response during pregnancy in a lizard. *Physiological and Biochemical Zoology*, 86(1), 127-136.
- Nathan, C., & Cunningham-Bussel, A. (2013). Beyond oxidative stress: an immunologist's guide to reactive oxygen species. *Nature Reviews Immunology*, 13(5), 349.
- Neuman-Lee, L. A., & French, S. S. (2014). Wound healing reduces stress-induced immune changes: evidence for immune prioritization in the side-blotched lizard. *Journal of Comparative Physiology B*, 184(5), 623-629.
- Obernier, J. A., & Baldwin, R. L. (2006). Establishing an appropriate period of acclimatization following transportation of laboratory animals. *ILAR journal*, 47(4), 364-369.
- Paardekooper, L. M., Dingjan, I., Linders, P. T., Staal, A. H., Cristescu, S. M., Verberk, W. C., & van den Bogaart, G. (2019). Human monocyte-derived dendritic cells produce millimolar concentrations of ROS in phagosomes per second. *Frontiers in immunology*, 10, 1216.
- Price, E. R. (2017). The physiology of lipid storage and use in reptiles. *Biological Reviews*, 92(3), 1406-1426.

- Puertollano, M., Puertollano, E., Alvarez de Cienfuegos, G., & A de Pablo, M. (2011). Dietary antioxidants: immunity and host defense. *Current topics in medicinal chemistry*, 11(14), 1752-1766.
- Rakus, K., Ronsmans, M., & Vanderplasschen, A. (2017). Behavioral fever in ectothermic vertebrates. *Developmental & Comparative Immunology*, 66, 84-91.
- Sebastiano, M., Eens, M., Messina, S., AbdElgawad, H., Pineau, K., Beemster, G. T., . . . Costantini, D. (2018). Resveratrol supplementation reduces oxidative stress and modulates the immune response in free living animals during a viral infection. *Functional Ecology*, 32(11), 2509-2519.
- Shini, S., Kaiser, P., Shini, A., & Bryden, W. L. (2008). Biological response of chickens (*Gallus gallus domesticus*) induced by corticosterone and a bacterial endotoxin. *Comparative Biochemistry and Physiology Part B: Biochemistry and Molecular Biology*, 149(2), 324-333.
- Sies, H., Berndt, C., & Jones, D. P. (2017). Oxidative stress. *Annual review of biochemistry*, 86, 715-748.
- Smith, G. D., Neuman-Lee, L. A., Webb, A. C., Angilletta, M. J., DeNardo, D. F., & French, S. S. (2017). Metabolic responses to different immune challenges and varying resource availability in the side-blotched lizard (*Uta stansburiana*). *Journal of Comparative Physiology B*, 187(8), 1173-1182.
- Sorci, G., & Faivre, B. (2008). Inflammation and oxidative stress in vertebrate host–parasite systems. *Philosophical Transactions of the Royal Society B: Biological Sciences*, 364(1513), 71-83.

- Stoot, L. J., Cairns, N. A., Cull, F., Taylor, J. J., Jeffrey, J. D., Morin, F., . . . Cooke, S. J. (2014). Use of portable blood physiology point-of-care devices for basic and applied research on vertebrates: a review. *Conservation Physiology*, 2(1).
- Surai, P. F., Kochish, I. I., Fisinin, V. I., & Kidd, M. T. (2019). Antioxidant defence systems and oxidative stress in poultry biology: An update. *Antioxidants*, 8(7), 235.
- Tan, Y., & Kagan, J. C. (2014). A cross-disciplinary perspective on the innate immune responses to bacterial lipopolysaccharide. *Molecular cell*, 54(2), 212-223.
- Team, R. C. (2018). R: a language and environment for statistical computing [URL: <http://www.R-project.org>]. Version 3.5. 1. Vienna, Austria. *R Foundation for Statistical Computing*.
- Thomsen, J. H., Etzerodt, A., Svendsen, P., & Moestrup, S. K. (2013). The haptoglobin-CD163-heme oxygenase-1 pathway for hemoglobin scavenging. *Oxidative medicine and cellular longevity*, 2013.
- Todd, G., Jodrey, A., & Stahlschmidt, Z. (2016). Immune activation influences the trade-off between thermoregulation and shelter use. *Animal Behaviour*, 118, 27-32.
- Tulli, M. J., Abdala, V., & Cruz, F. B. (2012). Effects of different substrates on the sprint performance of lizards. *Journal of Experimental Biology*, 215(5), 774-784.
- Tylan, C., Camacho, K., French, S., Graham, S. P., Herr, M. W., Jones, J., . . . Thawley, C. J. (2020). Obtaining plasma to measure baseline corticosterone concentrations in reptiles: how quick is quick enough? *General and comparative endocrinology*, 287, 113324.
- van de Crommenacker, J., Horrocks, N. P., Versteegh, M. A., Komdeur, J., Tieleman, B. I., & Matson, K. D. (2010). Effects of immune supplementation and immune challenge on oxidative status and physiology in a model bird: implications for ecologists. *Journal of Experimental Biology*, 213(20), 3527-3535.

- Vassalle, C. (2008). An easy and reliable automated method to estimate oxidative stress in the clinical setting. In *Advanced protocols in oxidative stress I* (pp. 31-39): Springer.
- Vassalle, C., Masini, S., Carpeggiani, C., L'Abbate, A., Boni, C., & CarloZucchelli, G. (2004). In vivo total antioxidant capacity: comparison of two different analytical methods. *Clinical Chemistry and Laboratory Medicine (CCLM)*, 42(1), 84-89.
- Vedder, H., Schreiber, W., Yassouridis, A., Gudewill, S., Galanos, C., & Pollmächer, T. (1999). Dose-dependence of bacterial lipopolysaccharide (LPS) effects on peak response and time course of the immune-endocrine host response in humans. *Inflammation Research*, 48(2), 67-74.
- Wagner, E., & Zani, P. A. (2017). Escape behavior of Side-blotched Lizards (*Uta stansburiana*) in response to model predators. *Canadian Journal of Zoology*, 95(12), 965-973.
- Wang, A. Z., Husak, J. F., & Lovern, M. (2019). Leptin ameliorates the immunity, but not reproduction, trade-off with endurance in lizards. *Journal of Comparative Physiology B*, 189(2), 261-269.
- West, A. P., Shadel, G. S., & Ghosh, S. (2011). Mitochondria in innate immune responses. *Nature Reviews Immunology*, 11(6), 389.
- Wickham, H. (2011). The split-apply-combine strategy for data analysis. *Journal of Statistical Software*, 40(1), 1-29.
- Wickham, H. (2012). reshape2: Flexibly reshape data: a reboot of the reshape package. *R package version*, 1(2).
- Wickham, H. (2016). *ggplot2: elegant graphics for data analysis*: Springer.

- Wobeser, G. A. (2013). *Essentials of disease in wild animals*: John Wiley & Sons.
- Zamora-Camacho, F. J. (2018). Integrating time progression in ecoimmunology studies: beyond immune response intensity. *Current zoology*, 65(2), 205-212.
- Zamora-Camacho, F. J., Reguera, S., Rubiño-Hispán, M. V., & Moreno-Rueda, G. (2014). Eliciting an immune response reduces sprint speed in a lizard. *Behavioral Ecology*, 26(1), 115-120.
- Zani, P., Jones, T., Neuhaus, R., & Milgrom, J. (2009). Effect of refuge distance on escape behavior of side-blotched lizards (*Uta stansburiana*). *Canadian Journal of Zoology*, 87(5), 407-414.
- Zimmerman, L., Vogel, L., & Bowden, R. (2010). Understanding the vertebrate immune system: insights from the reptilian perspective. *Journal of Experimental Biology*, 213(5), 661-671.
- Zimmerman, L. M. (2020). The reptilian perspective on vertebrate immunity: 10 years of progress. *Journal of Experimental Biology*, 223(21).

|  |  |
|--|--|
|  |  |
|  |  |
|  |  |
|  |  |
|  |  |
|  |  |

|  |  |
|--|--|
|  |  |
|  |  |

## Figures

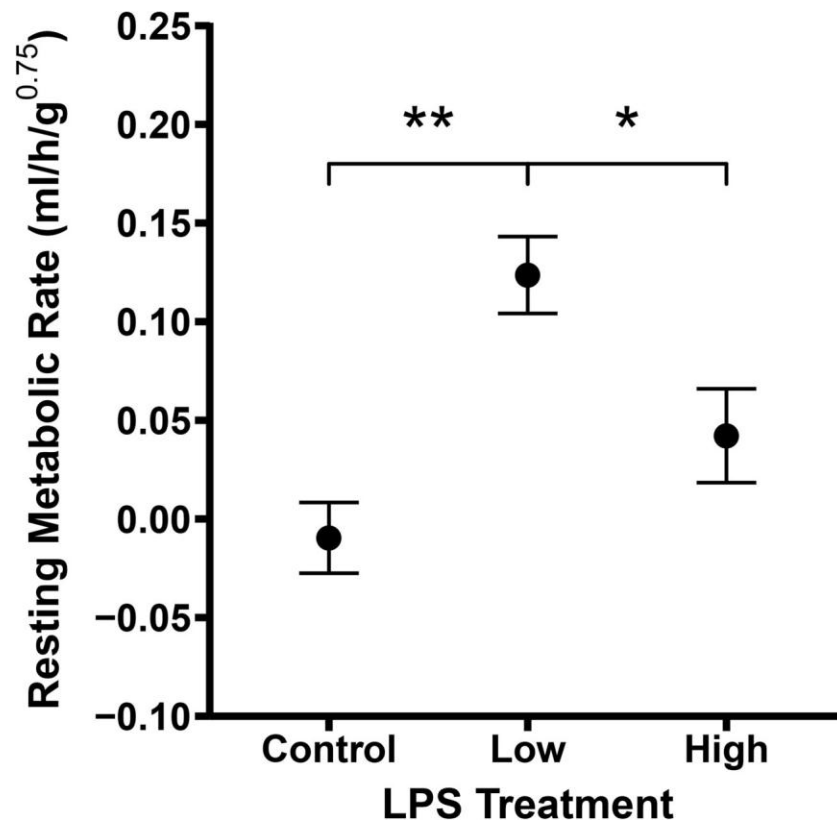

**Figure 1.** Change in mass-adjusted resting metabolic rate (ml/h/g<sup>0.75</sup>) across LPS and control treatments in adult male side-blotched lizards ( $F_{2,50} = 9.418$ ,  $p = 0.0003$ ,  $n = 53$ ). Points with error bars represent group mean concentrations with two-sided 95% confidence intervals. Asterisks represent the degree of significance between comparisons ( $p < 0.05 = *$ ,  $p < 0.005 = **$ ,  $p < 0.0005 = ***$ ), whereas a lack thereof indicates no significant relationship.



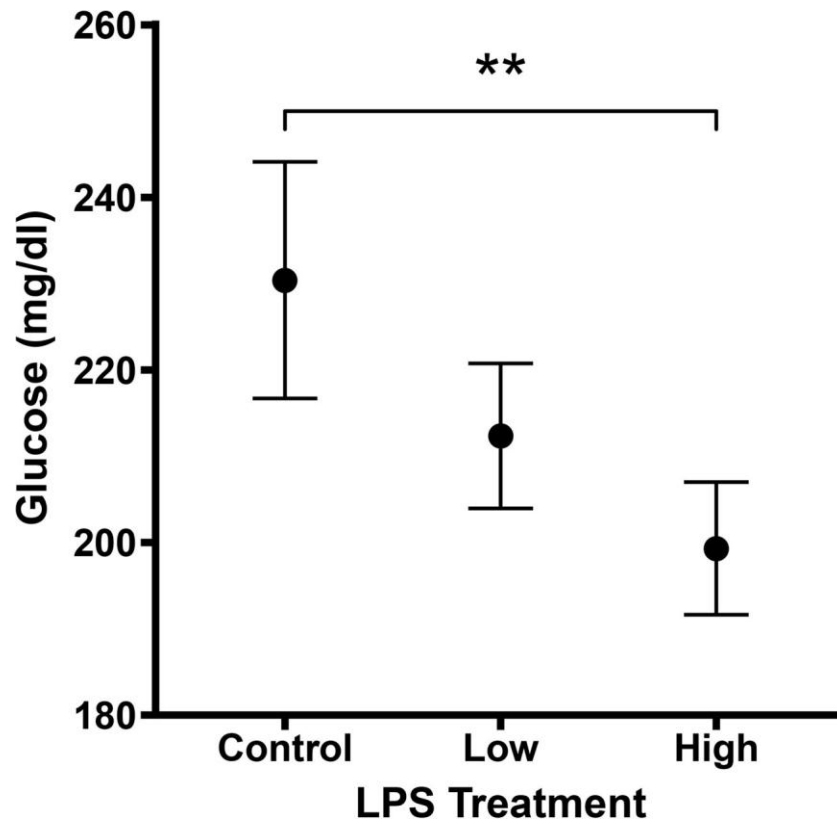

**Figure 2.** Circulating glucose levels (mg/dl) across LPS and control treatments in adult male side-blotched lizards ( $F_{2,46} = 5.558$ ,  $p = 0.007$ ,  $n = 51$ ). Points with error bars represent group mean concentrations with two-sided 95% confidence intervals. Asterisks represent the degree of significance between comparisons ( $p < 0.05 = *$ ,  $p < 0.005 = **$ ,  $p < 0.0005 = ***$ ), whereas a lack thereof indicates no significant relationship.

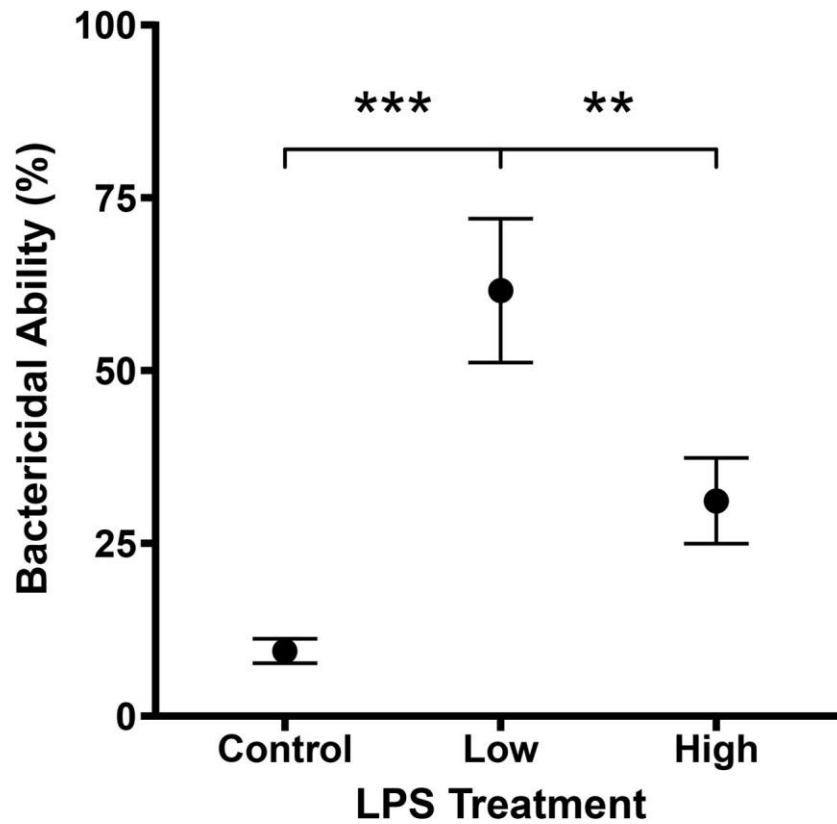

**Figure 3.** Bactericidal ability (%) across LPS and control treatments in adult male side-blotched lizards ( $F_{2,49} = 13.94$ ,  $p < 0.0005$ ,  $n = 52$ ). Points with error bars represent group mean concentrations with two-sided 95% confidence intervals. Asterisks represent the degree of significance between comparisons ( $p < 0.05 = *$ ,  $p < 0.005 = **$ ,  $p < 0.0005 = ***$ ), whereas a lack thereof indicates no significant relationship.

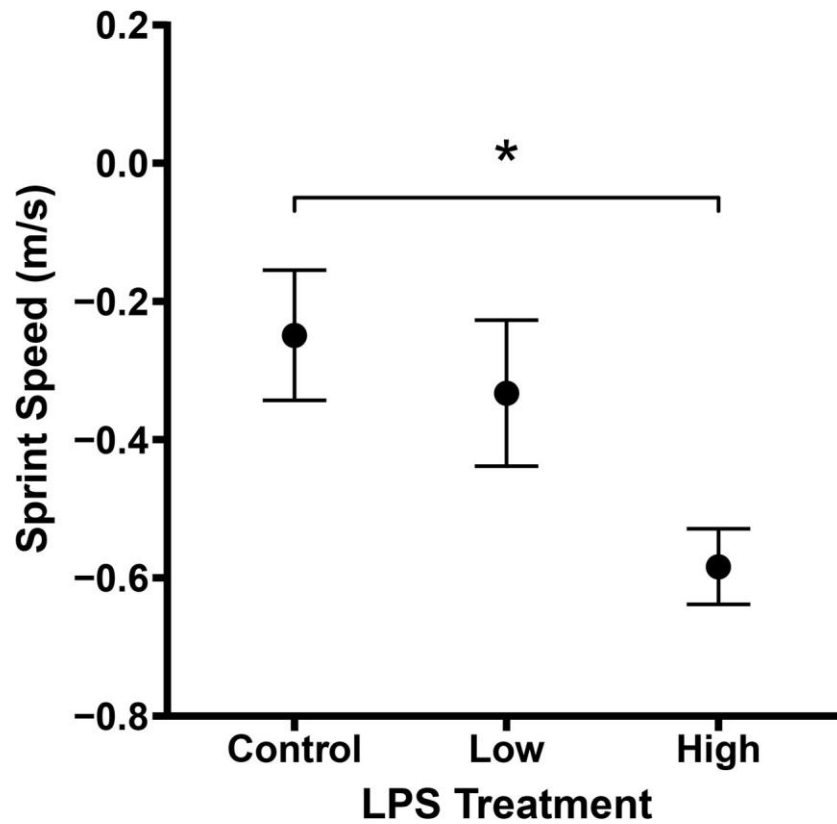

**Figure 4.** Change in sprint speed (m/s) across LPS and control treatments in adult male side-blotched lizards ( $F_{2,45} = 4.506$ ,  $p = 0.016$ ,  $n = 48$ ). Points with error bars represent group mean concentrations with two-sided 95% confidence intervals. Asterisks represent the degree of significance between comparisons ( $p < 0.05 = *$ ,  $p < 0.005 = **$ ,  $p < 0.0005 = ***$ ), whereas a lack thereof indicates no significant relationship.

**Table 1.** Timeline of procedures for experiment.

| <b>Time (days)</b> | <b>Experimental procedure</b>                     |
|--------------------|---------------------------------------------------|
| Before day 1       | Acclimation period (food provision / restriction) |
| Day 1              | Sprint trials / metabolic trials                  |
| Day 2              | Food provision / restriction                      |
| Day 3              | LPS injections                                    |
| Day 4              | Food provision / restriction                      |
| Day 5              | Sprint trials / metabolic trials                  |
| Day 6              | Blood sampling / food provision                   |
